# Supplementary material
Source: PubMed Central journal article supplement (PMC4933963)

Figure S6.

**A** Concentration trigger

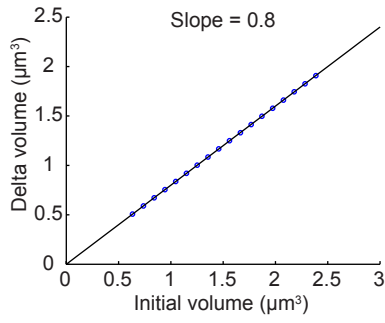

**B** Amount trigger

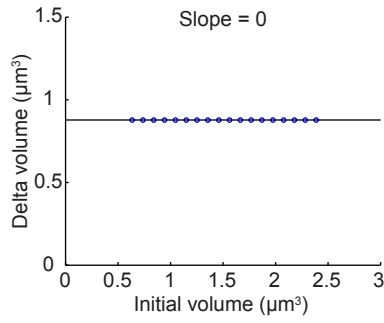

**C** Initialize material =  $1 \mu\text{m}^2$

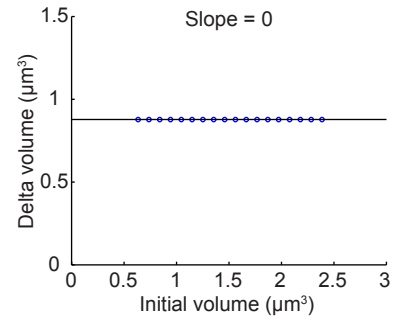

**D**

Surface destruction rate = Accumulated surface concentration  $\times$   $k_{\text{destruct}}$   
 $(\mu\text{m}^2/\mu\text{m}^3)/\text{h}$                        $\mu\text{m}^2/\mu\text{m}^3$                        $(\text{h}^{-1})$

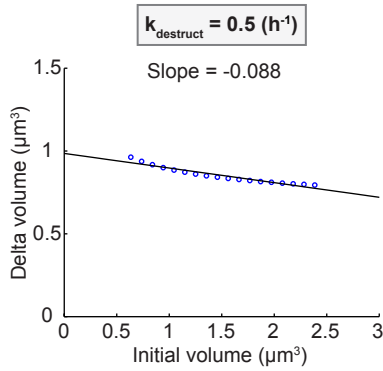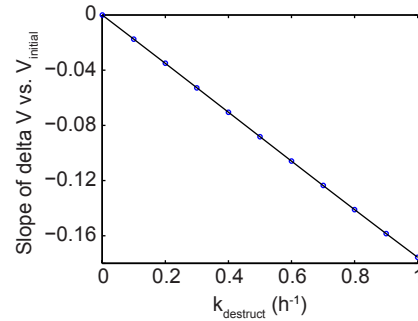

**E**

Radius thinning rate = Accumulated surface concentration  $\times$  Thinning rate scaling factor  
 $(\mu\text{m h}^{-1})$                        $\mu\text{m}^2/\mu\text{m}^3$                        $(\text{h}^{-1} \mu\text{m}^2)$

Thinning rate scaling factor =  $0.015 (\text{h}^{-1} \mu\text{m}^{-1})$

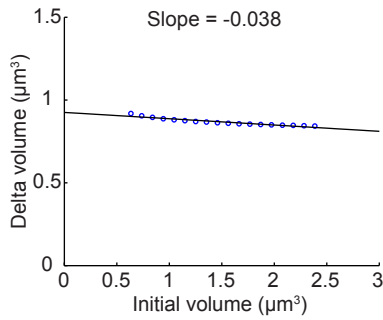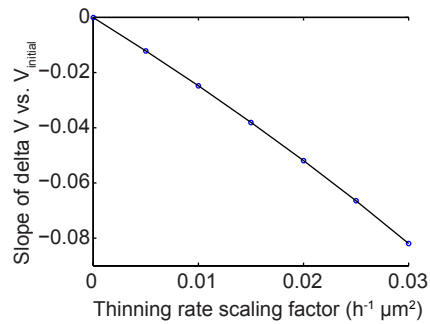

**F**

Cell width =  $0.85 \mu\text{m}$   
 Cell width =  $0.95 \mu\text{m}$

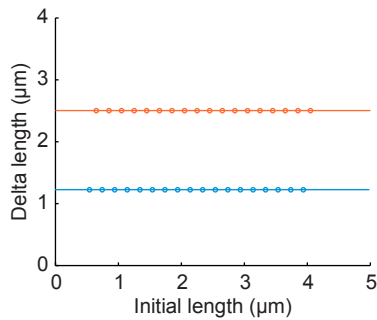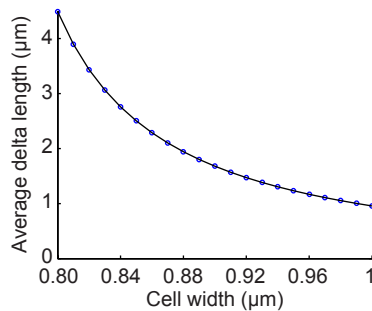

*E. coli mreB<sup>A53</sup> mutants*  
 Reproduced from Monds et al. 2014

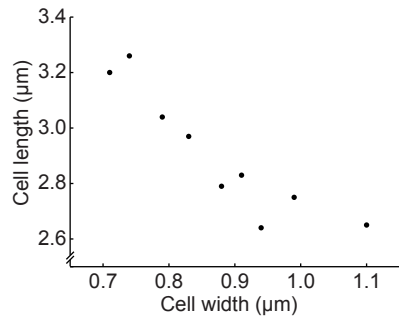

Supplement: NIHMS795747-supplement-Fig__S6.pdf [file NIHMS795747-supplement-Fig__S6.pdf]
