# Supplementary material
Source: PubMed Central journal article supplement (PMC4933963)

Figure S1.

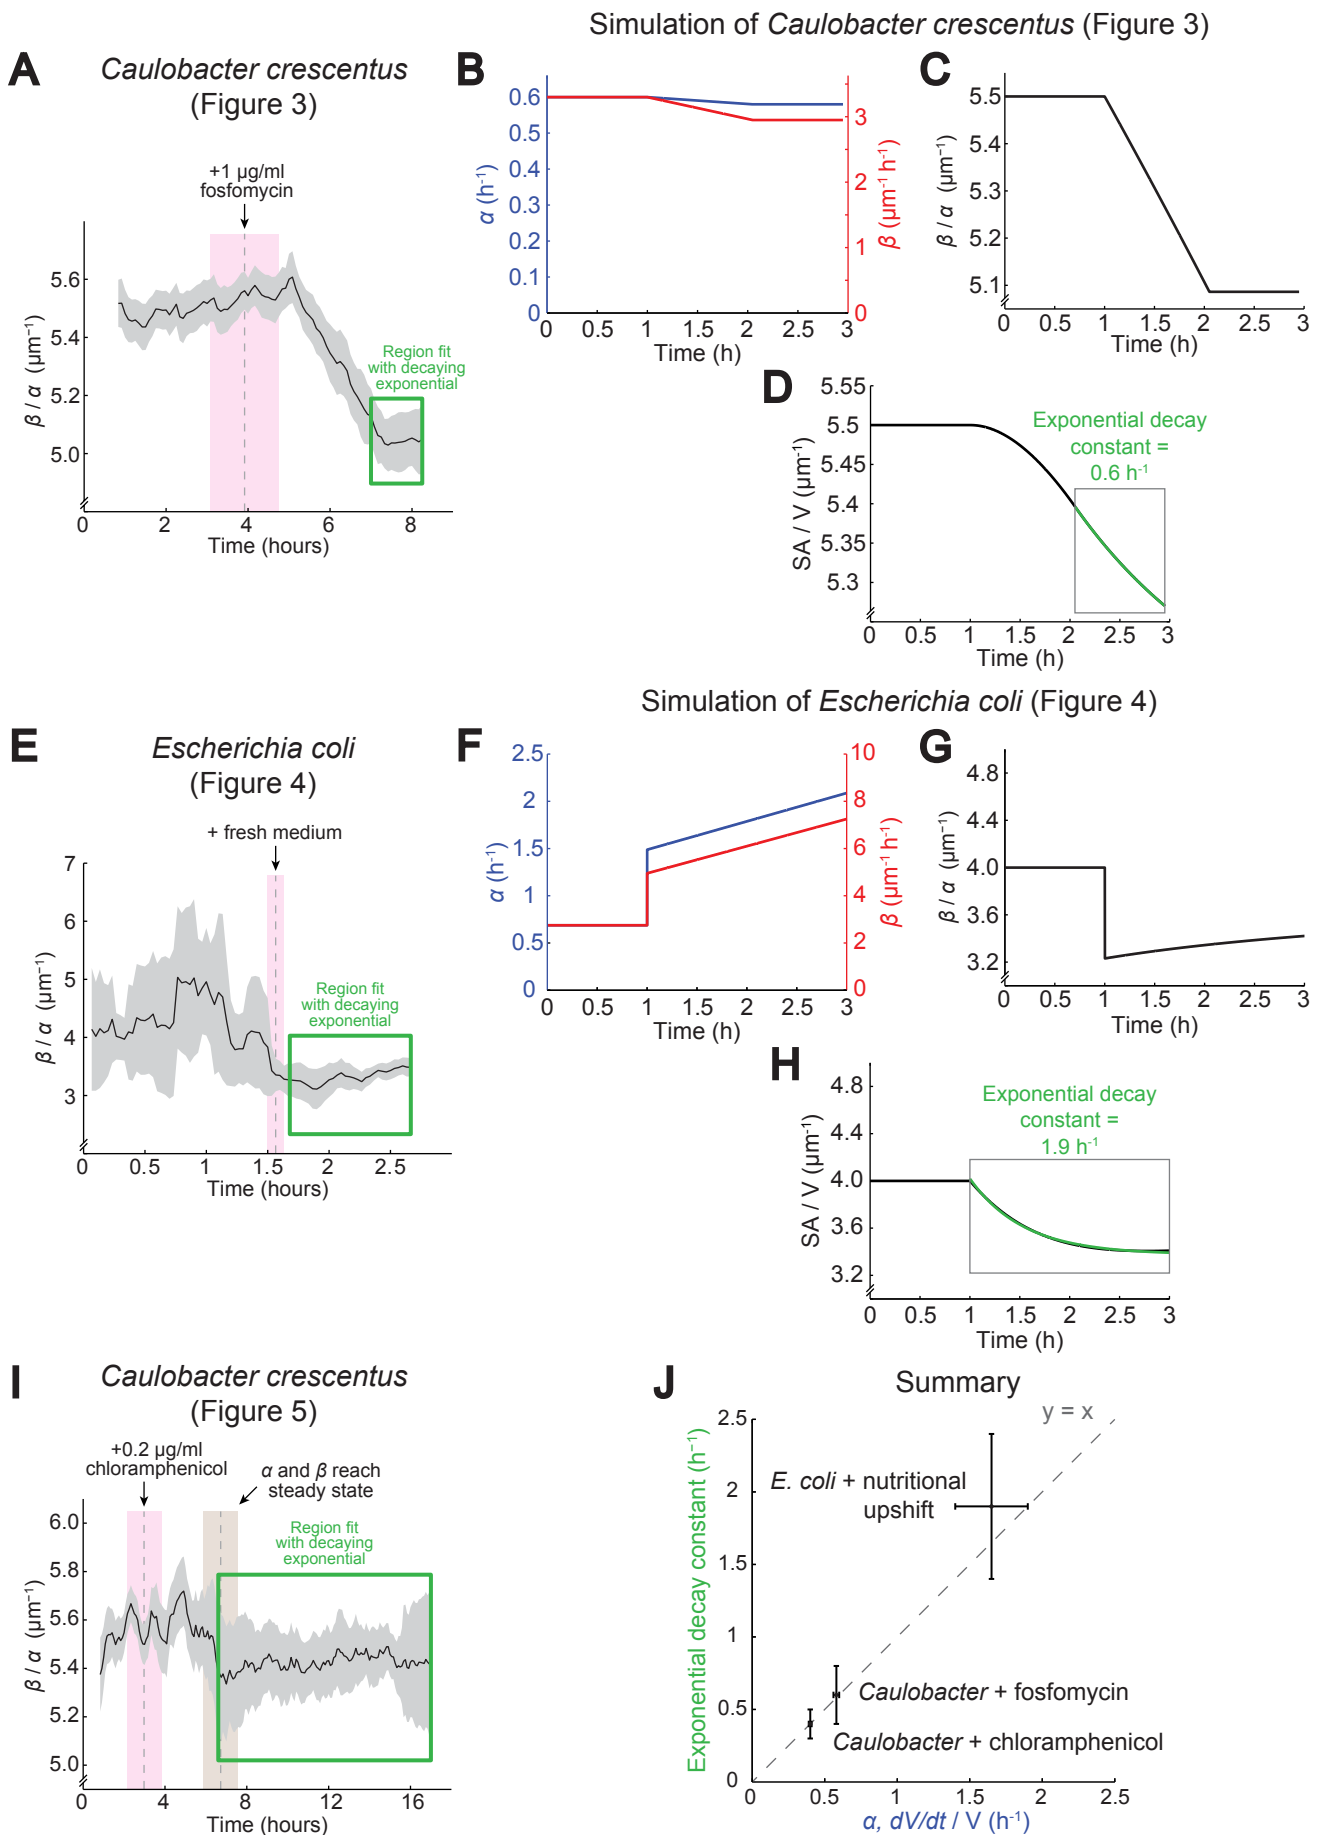

Supplement: NIHMS795747-supplement-Fig__S1.pdf [file NIHMS795747-supplement-Fig__S1.pdf]

Figure S2.

**A** *Escherichia coli* in chloramphenicol

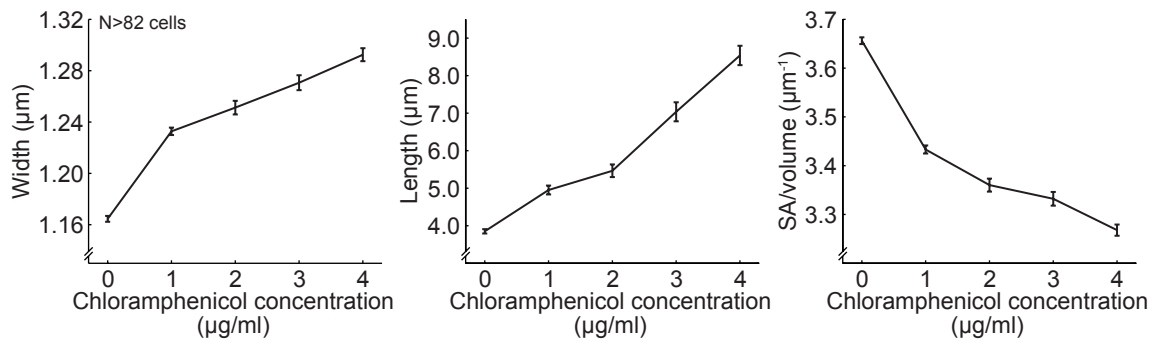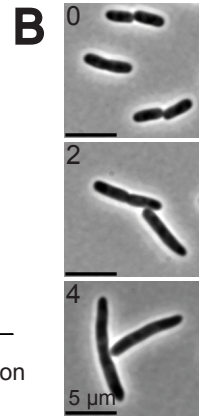

**C** *Listeria monocytogenes* in chloramphenicol

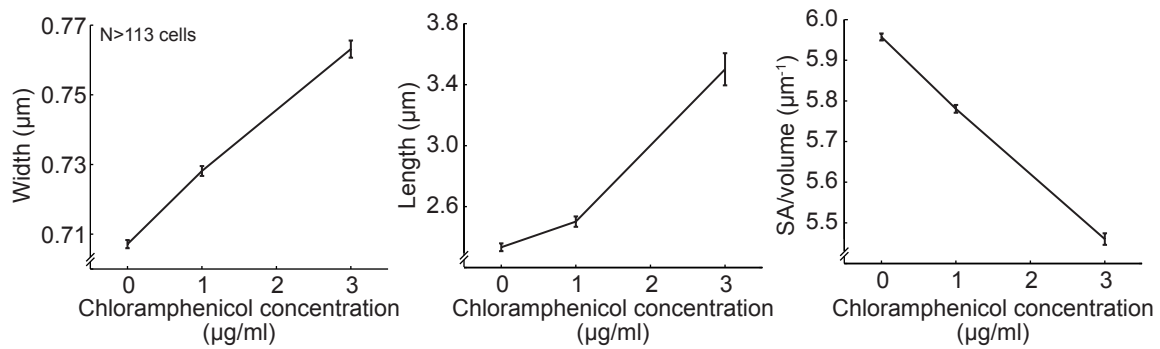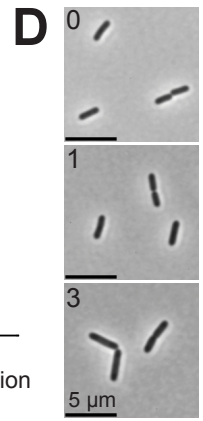

Supplement: NIHMS795747-supplement-Fig__S2.pdf [file NIHMS795747-supplement-Fig__S2.pdf]

Figure S3.

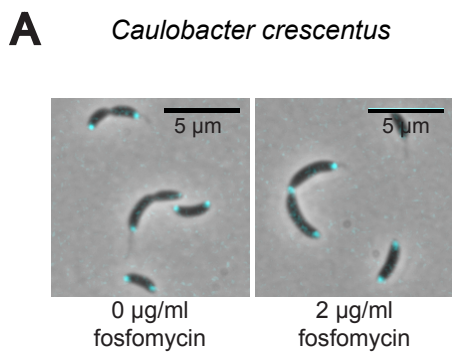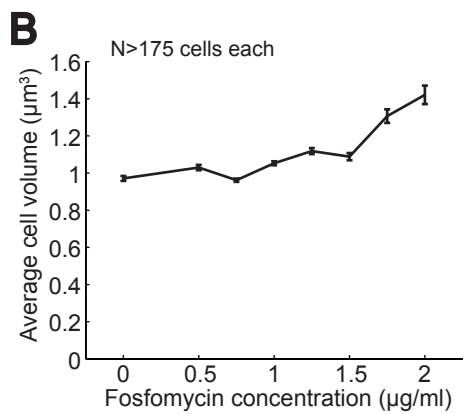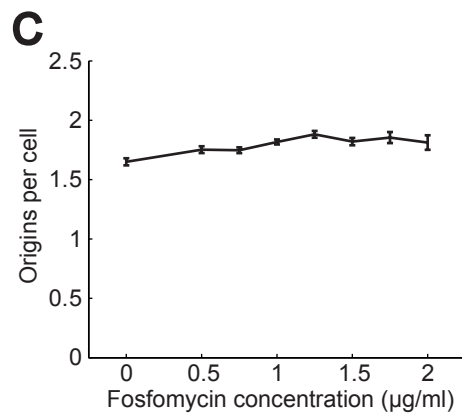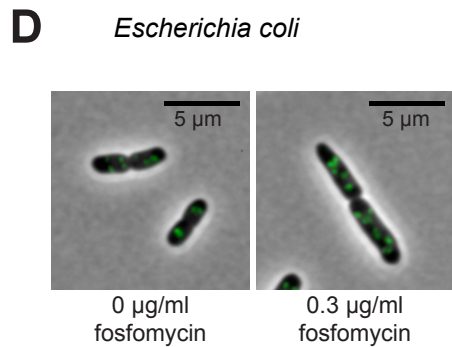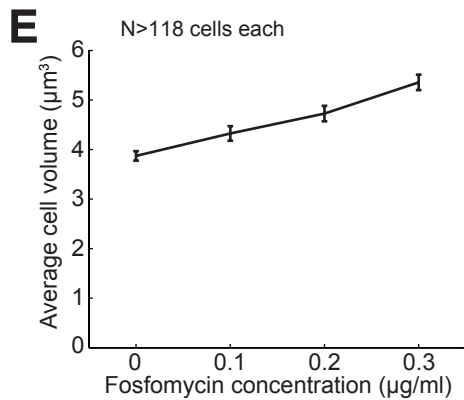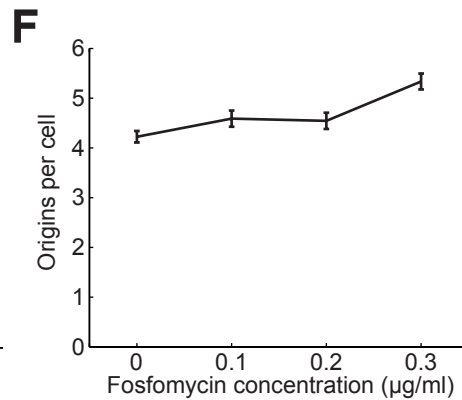

Supplement: NIHMS795747-supplement-Fig__S3.pdf [file NIHMS795747-supplement-Fig__S3.pdf]

Figure S4.

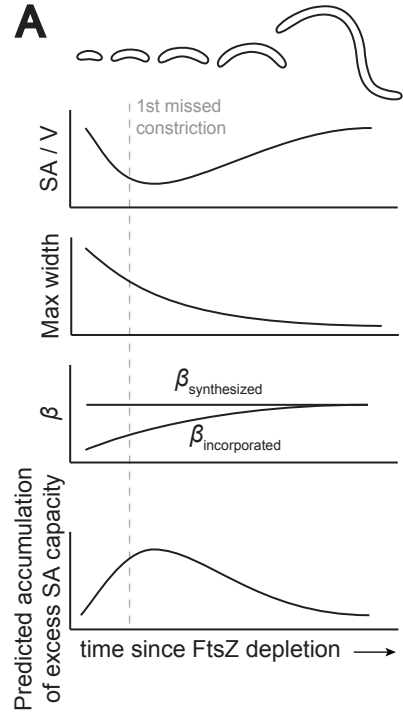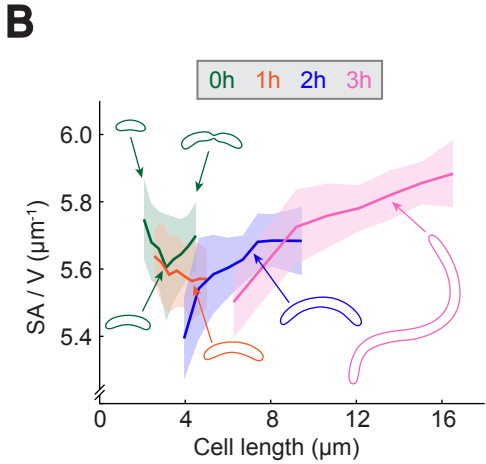

Supplement: NIHMS795747-supplement-Fig__S4.pdf [file NIHMS795747-supplement-Fig__S4.pdf]

Figure S5.

**A**

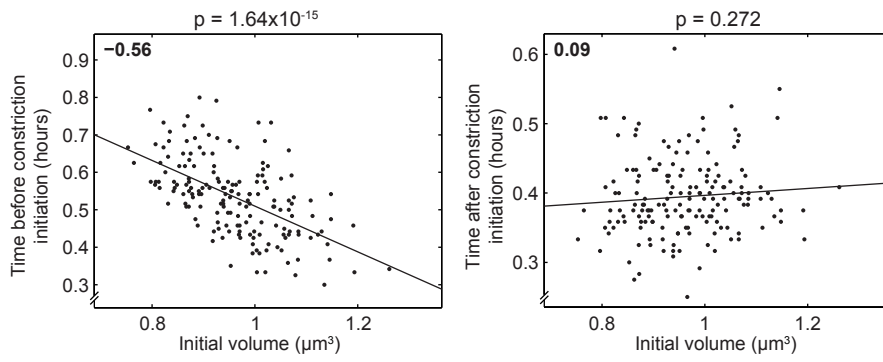

**B**

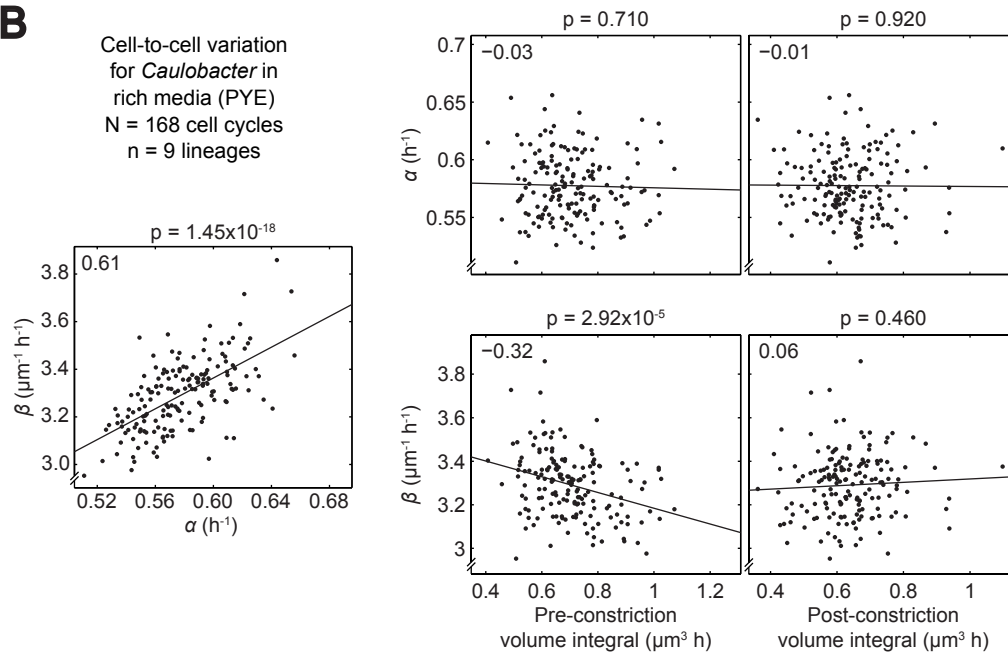

Supplement: NIHMS795747-supplement-Fig__S5.pdf [file NIHMS795747-supplement-Fig__S5.pdf]

Figure S7.

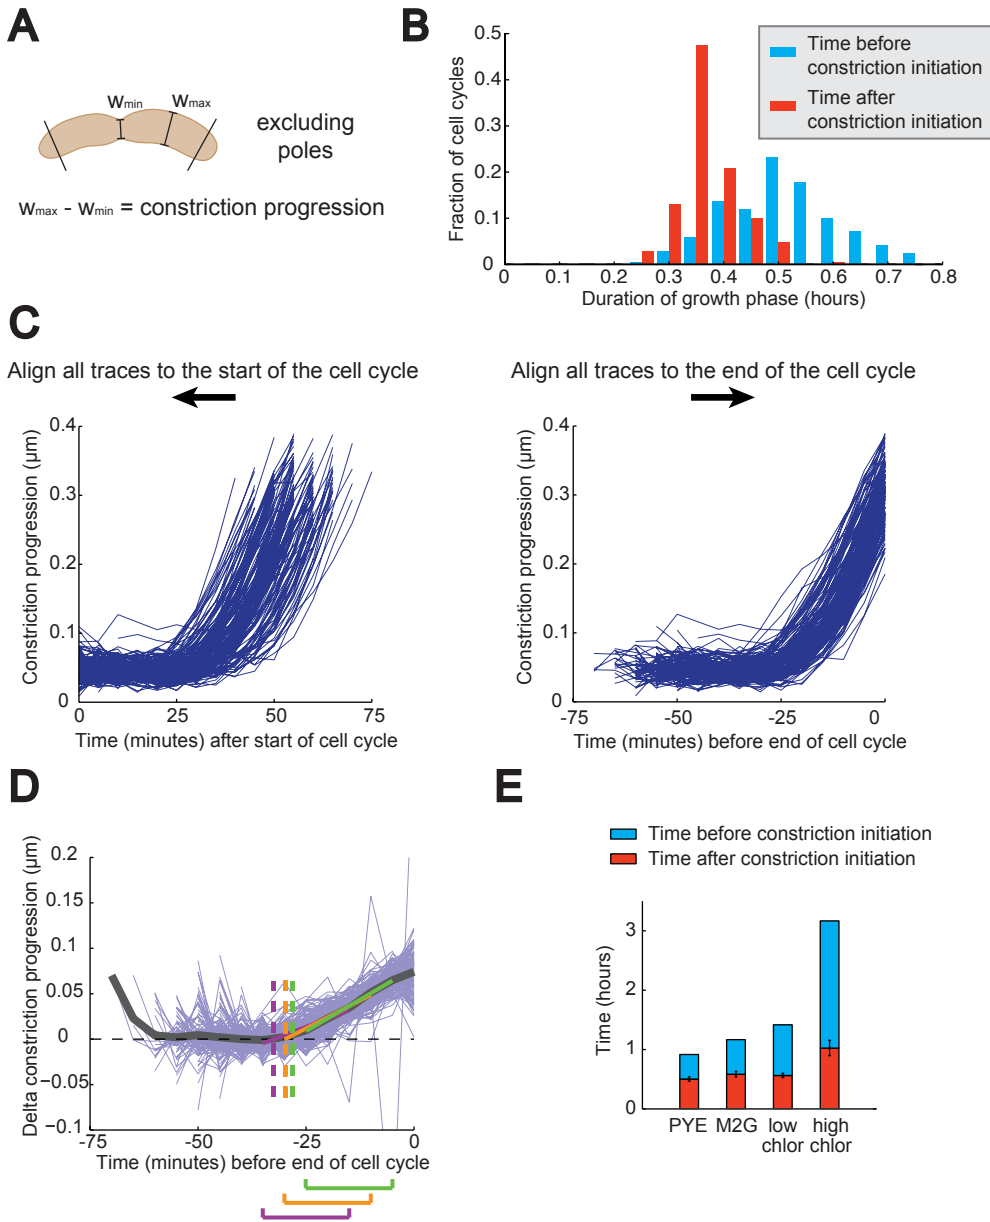

Supplement: NIHMS795747-supplement-Fig__S7.pdf [file NIHMS795747-supplement-Fig__S7.pdf]
